# Supplementary material for: Structural Basis for Recruitment of DAPK1 to the KLHL20 E3 Ligase
Source: PubMed Central journal article supplement (PMC6720452; doi:10.1016/j.str.2019.06.005), 2019-09-03
Supplement: mmc1.pdf [file mmc1.pdf]

**Structure, Volume 27**

**Supplemental Information**

**Structural Basis for Recruitment  
of DAPK1 to the KLHL20 E3 Ligase**

**Zhuoyao Chen, Sarah Picaud, Panagis Filippakopoulos, Vincenzo D'Angiolella, and Alex N. Bullock**

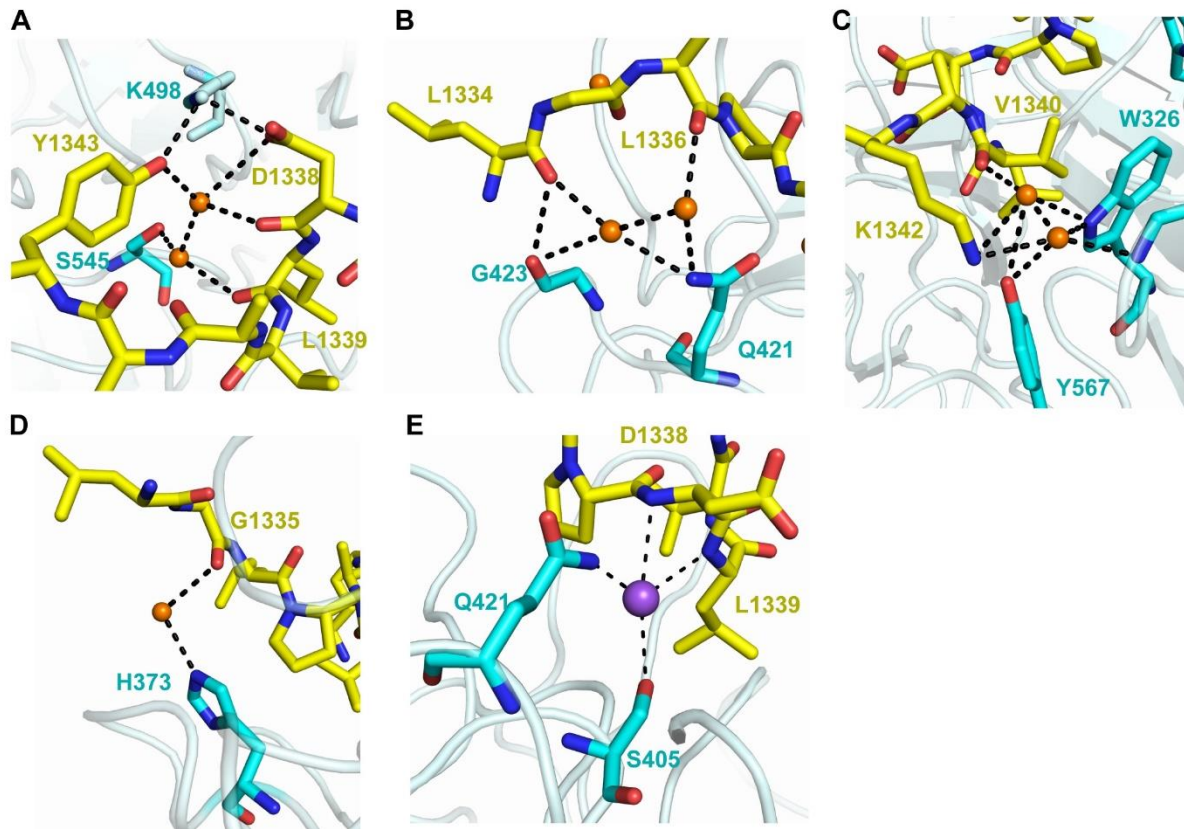

**Figure S1. Indirect contacts between KLHL20 and DAPK1, related to Figure 4. (A-D)** Water-bridged hydrogen bonds in the protein-peptide interface. Waters are shown as orange spheres. **(E)** A sodium ion (purple sphere) is proximal for electrostatic interactions with the side chains of KLHL20 Ser405 and Gln421 as well as the backbone atoms of DAPK1 D1338 and L1339.

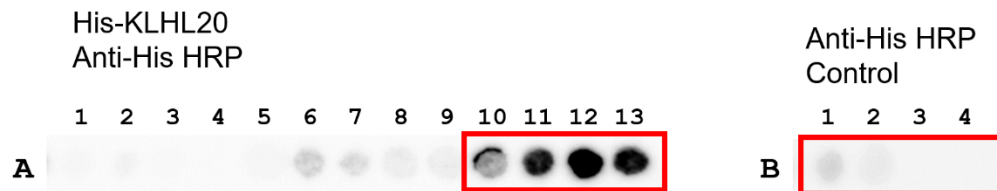

| SPOT | Peptide                       | Residues |
|------|-------------------------------|----------|
| A1   | V-G-D-Q-R-T-E-F-L-G-A-A-P-L-G | 654-668  |
| A2   | Q-R-T-E-F-L-G-A-A-P-L-G-P-P-V | 657-671  |
| A3   | E-F-L-G-A-A-P-L-G-P-P-V-S-P-P | 660-674  |
| A4   | G-A-A-P-L-G-P-P-V-S-P-P-H-V-S | 663-677  |
| A5   | P-L-G-P-P-V-S-P-P-H-V-S-T-F-K | 666-680  |
| A6   | P-P-V-S-P-P-H-V-S-T-F-K-T-R-S | 669-683  |
| A7   | S-P-P-H-V-S-T-F-K-T-R-S-A-K-G | 672-686  |
| A8   | H-V-S-T-F-K-T-R-S-A-K-G-F-G-A | 675-689  |
| A9   | T-F-K-T-R-S-A-K-G-F-G-A-R-G-P | 678-692  |
| A10  | T-R-S-A-K-G-F-G-A-R-G-P-D-V-L | 681-695  |
| A11  | A-K-G-F-G-A-R-G-P-D-V-L-S-P-A | 684-698  |
| A12  | F-G-A-R-G-P-D-V-L-S-P-A-M-V-A | 687-701  |
| A13  | R-G-P-D-V-L-S-P-A-M-V-A-L-S-N | 690-704  |
| B1   | T-R-S-A-K-G-F-G-A-R-G-P-D-V-L | 681-695  |
| B2   | A-K-G-F-G-A-R-G-P-D-V-L-S-P-A | 684-698  |
| B3   | F-G-A-R-G-P-D-V-L-S-P-A-M-V-A | 687-701  |
| B4   | R-G-P-D-V-L-S-P-A-M-V-A-L-S-N | 690-704  |

**Figure S2. SPOTs peptide array for EPAS1, related to Figure 1.** Each spot was printed as a 15-mer EPAS1 peptide with a 3 residue frameshift at each consecutive position. SPOTs array A1-13 was incubated with purified 6xHis-KLHL20 Kelch domain, washed and then KLHL20 binding detected using anti-His HRP-conjugated antibody. Binding was observed at peptides containing a 'GPDVL' motif. As a control, duplicate SPOTs array B1-B4 was probed with antibody alone.

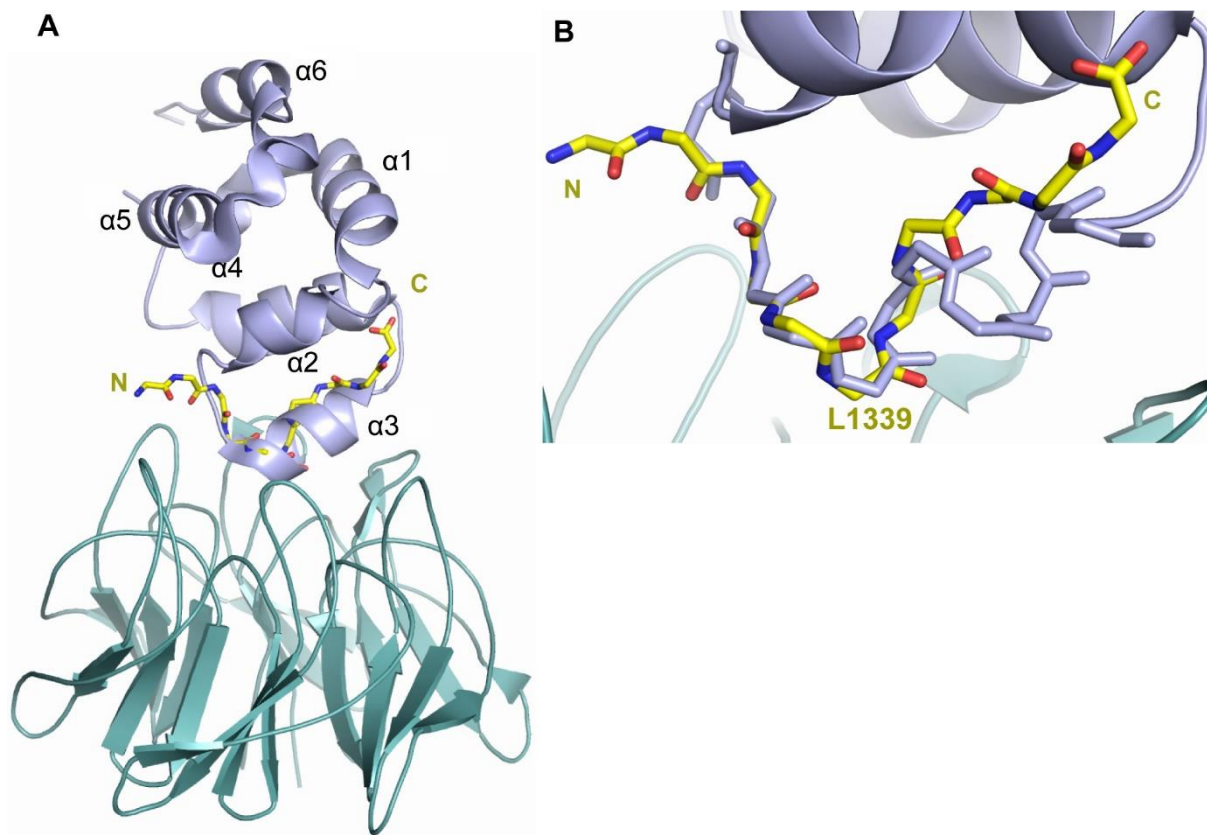

**Figure S3. Structural comparison between the DAPK1 peptide and MyD88 death domain, related to Figure 7. (A)** Superposition of the KLHL20 Kelch domain-DAPK1 structure (cyan/yellow) and the structure of the MyD88 death domain (light purple; PDB 3MOP chain A) based on the DAPK1 'LPDLV' motif. **(B)** Close-up view showing good agreement between the helical conformation of the 'LPDLV' motif in the crystallized DAPK1 peptide and the MyD88 structure.
